# Supplementary material
Source: publisher figshare collection journal article supplement (https://sage.figshare.com/ndownloader/files/17497052)
Supplement: Supplementary file 1 [file 17497052]

**Figure 4A:** Elbow torque Coefficient of Variation (CV) across the structured long-toss program

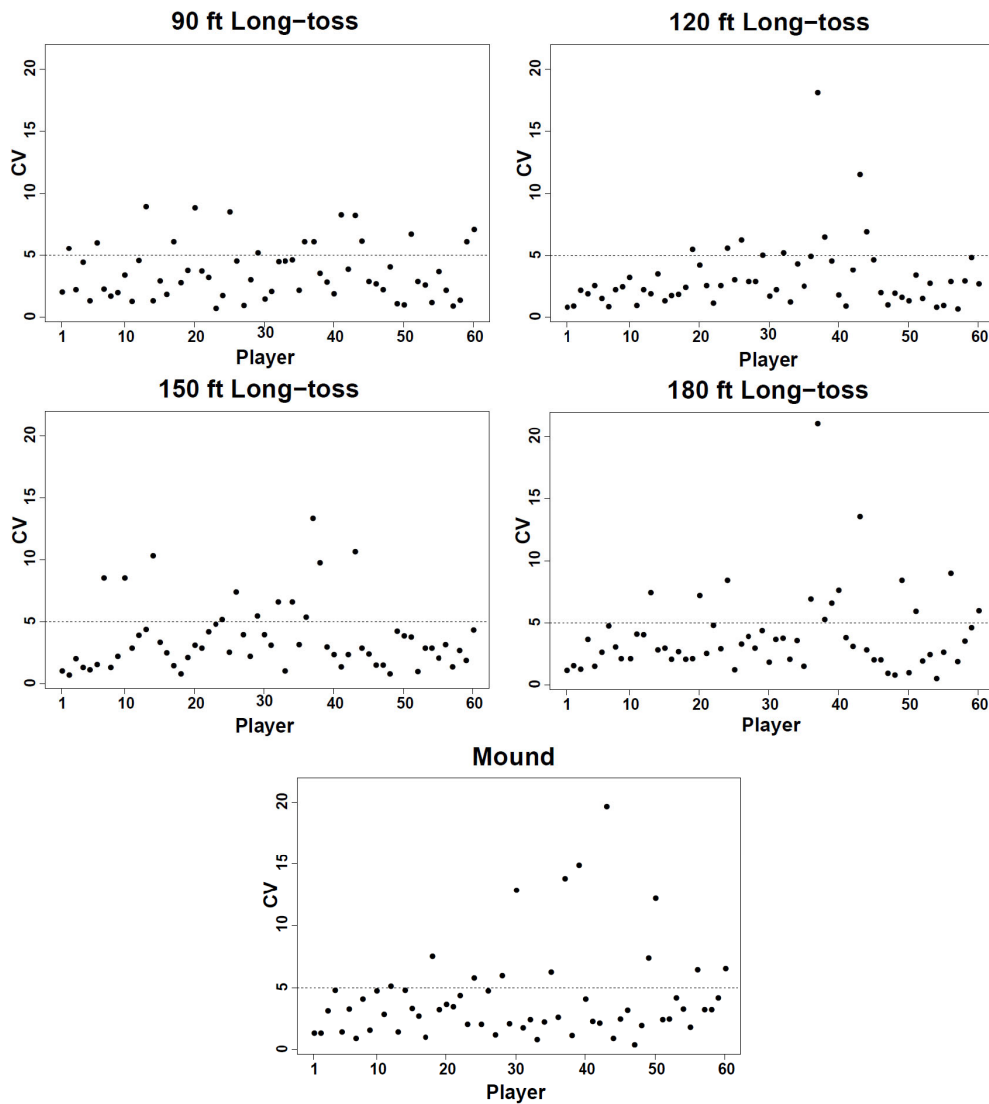

1

2 **Figure 4A: Elbow torque Coefficient of Variation (CV) across the structured long-toss**  
3 **program**

4 The dashed line at CV of 5% represents the upper limit of acceptable variability.

**Figure 4B: Ball velocity Coefficient of Variation (CV) across the structured long-toss program**

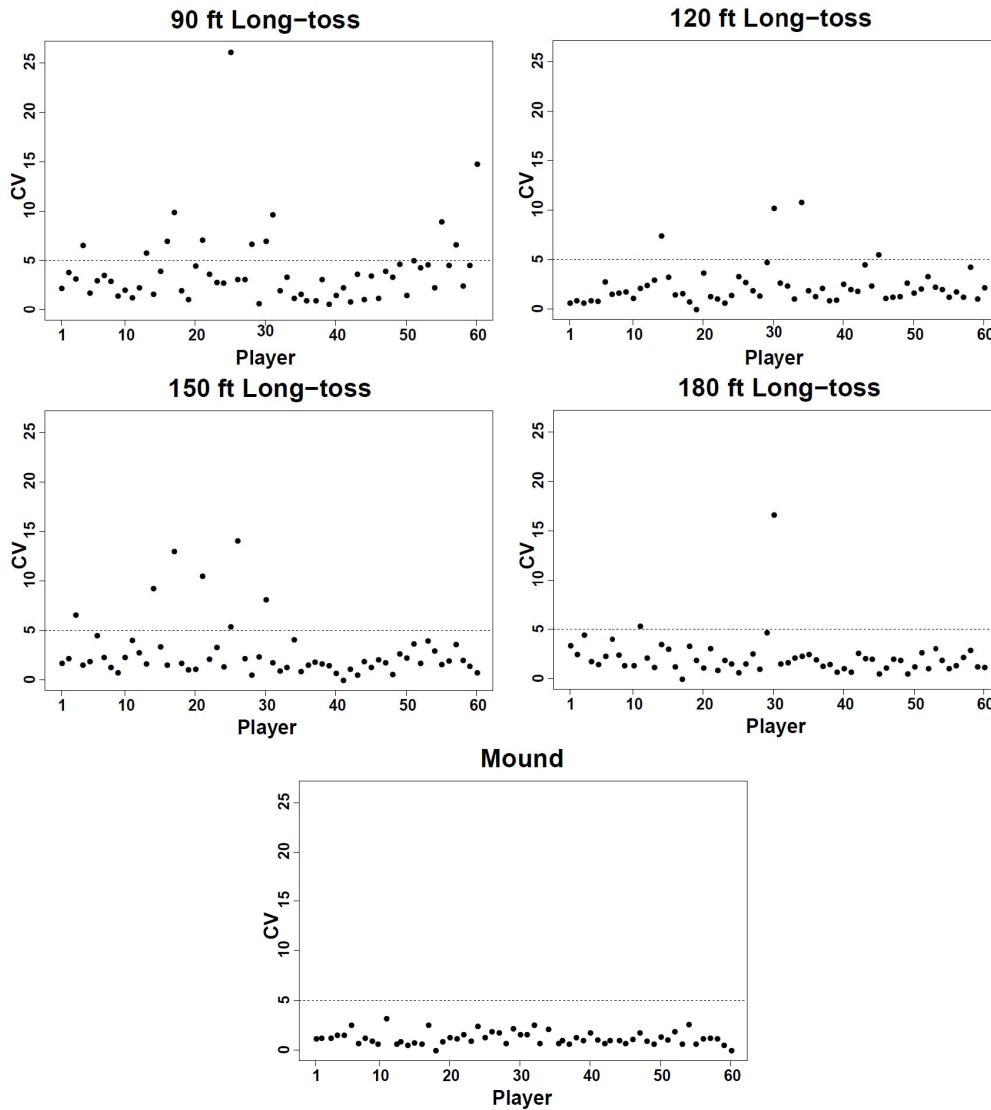

5

6 **Figure 4B: Coefficient of Variation (CV) to assess inter-thrower reliability for ball velocity**  
7 **across the structured throwing program.**

8 The dashed line at CV of 5% represents the upper limit of acceptable variability.
